# Supplementary material for: Staphylococcus epidermidis strains isolated from breast milk of women suffering infectious mastitis: potential virulence traits and resistance to antibiotics
Source: PubMed Central journal article supplement (PMC2685400; doi:10.1186/1471-2180-9-82), 2009-05-07

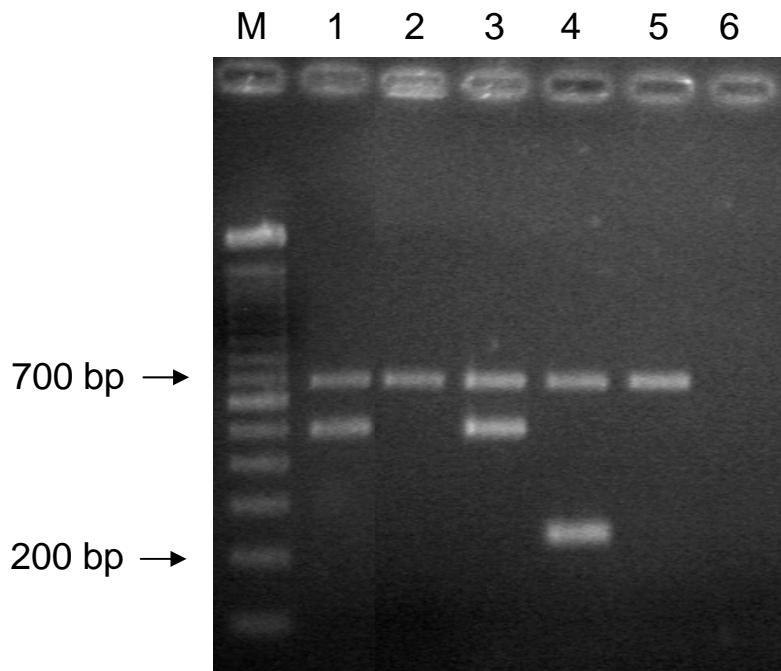

Supplement: 1471-2180-9-82-S3.pdf [file 1471-2180-9-82-S3.pdf]
